# Supplementary material for: Occupational and non-occupational risk factors of sickness absence due to a shoulder lesion
Source: HighWire-hosted journal article supplement (doi:10.1136/oemed-2019-106335), 2020-03-18
Supplement: oemed-2019-106335supp002_data_supplement.pdf [file oemed-2019-106335supp002_data_supplement.pdf]

**Supplementary table S1.** Associations between potential risk factors and sickness absence due to a shoulder lesion. Adjusted hazard ratios (HR) with 95% confidence intervals (CI) and population attributable fractions (PAF).

|                                        | Model 1                 |                  |      |                 |                  |      |                 |                  |      | Model 2         |                  |
|----------------------------------------|-------------------------|------------------|------|-----------------|------------------|------|-----------------|------------------|------|-----------------|------------------|
|                                        | All (n=3672)            |                  |      | Men (n=1783)    |                  |      | Women (n=1889)  |                  |      | All             |                  |
|                                        | HR <sup>1</sup>         | 95% CI           | PAF  | HR <sup>2</sup> | 95% CI           | PAF  | HR <sup>2</sup> | 95% CI           | PAF  | HR <sup>3</sup> | 95% CI           |
| <b>Age (at baseline)</b>               |                         |                  |      |                 |                  |      |                 |                  |      |                 |                  |
| 30-39 years                            | 1.00                    |                  |      | 1.00            |                  |      | 1.00            |                  |      | 1.00            |                  |
| 40-49 years                            | <b>2.29<sup>4</sup></b> | <b>1.71-3.08</b> |      | <b>2.02</b>     | <b>1.29-3.16</b> |      | <b>2.50</b>     | <b>1.69-3.69</b> |      | <b>2.06</b>     | <b>1.26-2.77</b> |
| 50-62 years                            | <b>4.57</b>             | <b>3.02-6.91</b> |      | <b>5.35</b>     | <b>2.98-9.60</b> |      | <b>3.82</b>     | <b>2.12-6.86</b> |      | <b>3.54</b>     | <b>2.31-5.41</b> |
| <b>Gender</b>                          |                         |                  |      |                 |                  |      |                 |                  |      |                 |                  |
| Men                                    | 0.33 <sup>2</sup>       | 0.72-1.19        |      | NA              |                  |      | NA              |                  |      | <b>0.66</b>     | <b>0.50-0.87</b> |
| Women                                  | 1.00                    |                  |      | NA              |                  |      | NA              |                  |      | 1.00            |                  |
| <b>Education</b>                       |                         |                  |      |                 |                  |      |                 |                  |      |                 |                  |
| Low                                    | <b>3.07</b>             | <b>2.00-4.73</b> |      | <b>4.38</b>     | <b>2.38-8.08</b> |      | <b>2.06</b>     | <b>1.07-3.98</b> |      | -               | -                |
| Middle                                 | <b>2.57</b>             | <b>1.92-3.43</b> |      | <b>2.48</b>     | <b>1.56-3.97</b> |      | <b>2.65</b>     | <b>1.83-3.84</b> |      | -               | -                |
| High                                   | 1.00                    |                  |      | 1.00            |                  |      | 1.00            |                  |      | -               |                  |
| <b>BMI (kg/m<sup>2</sup>)</b>          |                         |                  | 0.19 |                 |                  |      |                 |                  |      |                 |                  |
| Normal (< 25)                          | 1.00                    |                  |      | 1.00            |                  |      | 1.00            |                  |      | 1.00            |                  |
| Overweight (25.0-29.9)                 | <b>1.36</b>             | <b>1.02-1.82</b> |      | 1.38            | 0.87-2.19        |      | 1.44            | 0.99-2.08        |      | 1.33            | 0.99-1.78        |
| Obese (≥ 30)                           | <b>1.49</b>             | <b>1.05-2.10</b> |      | <b>2.10</b>     | <b>1.25-3.54</b> | 0.28 | 1.09            | 0.67-1.76        |      | 1.37            | 0.96-1.94        |
| <b>Chronic disease</b>                 |                         |                  |      |                 |                  |      |                 |                  |      |                 |                  |
| No                                     | 1.00                    |                  |      | 1.00            |                  |      | 1.00            |                  |      |                 |                  |
| Yes                                    | <b>1.41</b>             | <b>1.09-1.83</b> | 0.13 | 1.26            | 0.85-1.88        |      | <b>1.52</b>     | <b>1.08-2.14</b> | 0.17 | 1.24            | 0.94-1.61        |
| <b>Leisure time physical activity</b>  |                         |                  |      |                 |                  |      |                 |                  |      |                 |                  |
| Little or irregular                    | 1.00                    |                  |      | 1.00            |                  |      | 1.00            |                  |      | -               |                  |
| Regular                                | 0.79                    | 0.59-1.06        |      | 0.92            | 0.60-1.40        |      | 0.69            | 0.47-1.03        |      | -               | -                |
| <b>Daily smoking</b>                   |                         |                  |      |                 |                  |      |                 |                  |      |                 |                  |
| No                                     | 1.00                    |                  |      | 1.00            |                  |      | 1.00            |                  |      | 1.00            |                  |
| Yes                                    | <b>1.80</b>             | <b>1.39-2.34</b> | 0.18 | <b>1.58</b>     | <b>1.07-2.33</b> | 0.16 | <b>1.99</b>     | <b>1.40-2.82</b> | 0.18 | <b>1.66</b>     | <b>1.27-2.17</b> |
| <b>Psychological distress (GHQ-12)</b> |                         |                  |      |                 |                  |      |                 |                  |      |                 |                  |

|                                                                    |             |                  |      |             |                  |      |             |                  |      |             |                  |
|--------------------------------------------------------------------|-------------|------------------|------|-------------|------------------|------|-------------|------------------|------|-------------|------------------|
| No or mild                                                         | 1.00        |                  |      | 1.00        |                  |      | 1.00        |                  |      | 1.00        |                  |
| At least moderate                                                  | 1.22        | 0.88-1.68        |      | 0.98        | 0.57-1.68        |      | 1.38        | 0.92-2.07        |      | 0.94        | 0.67-1.34        |
| <b>Insomnia-related symptoms</b>                                   |             |                  | 0.15 |             |                  | 0.12 |             |                  | 0.17 |             |                  |
| No or rare                                                         | 1.00        |                  |      | 1.00        |                  |      | 1.00        |                  |      | 1.00        |                  |
| Occasional or frequent                                             | <b>1.60</b> | <b>1.22-2.08</b> |      | <b>1.52</b> | <b>1.00-2.30</b> |      | <b>1.66</b> | <b>1.17-2.35</b> |      | <b>1.58</b> | <b>1.18-2.11</b> |
| <b>Cumulative exposure to physically heavy work</b>                |             |                  |      |             |                  |      |             |                  |      |             |                  |
| < 1 year                                                           | 1.00        |                  |      | 1.00        |                  |      | 1.00        |                  |      | 1.00        |                  |
| 1-10 years                                                         | 0.97        | 0.61-1.54        |      | 1.24        | 0.67-2.32        |      | 0.69        | 0.33-1.45        |      | 0.76        | 0.43-1.34        |
| > 10 years                                                         | <b>2.66</b> | <b>2.03-3.49</b> | 0.27 | <b>2.33</b> | <b>1.53-3.55</b> | 0.24 | <b>2.99</b> | <b>2.11-4.23</b> | 0.28 | <b>1.71</b> | <b>1.19-2.47</b> |
| <b>Cumulative exposure to manual handling of heavy loads</b>       |             |                  |      |             |                  |      |             |                  |      |             |                  |
| < 1 year                                                           | 1.00        |                  |      | 1.00        |                  |      | 1.00        |                  |      | 1.00        |                  |
| 1-10 years                                                         | 1.38        | 0.94-2.03        |      | 1.34        | 0.77-2.34        |      | 1.41        | 0.83-2.40        |      | 1.26        | 0.78-2.06        |
| > 10 years                                                         | <b>2.18</b> | <b>1.63-2.92</b> | 0.09 | <b>1.99</b> | <b>1.31-3.01</b> | 0.10 | <b>2.40</b> | <b>1.59-3.63</b> | 0.07 | 1.08        | 0.75-1.55        |
| <b>Cumulative exposure to work with hands above shoulder level</b> |             |                  |      |             |                  |      |             |                  |      |             |                  |
| < 1 year                                                           | 1.00        |                  |      | 1.00        |                  |      | 1.00        |                  |      | 1.00        |                  |
| 1-10 years                                                         | 1.13        | 0.75-1.71        |      | 1.45        | 0.81-2.58        |      | 0.94        | 0.51-1.72        |      | 0.88        | 0.54-1.44        |
| > 10 years                                                         | <b>2.26</b> | <b>1.72-2.98</b> | 0.14 | <b>2.74</b> | <b>1.81-4.14</b> | 0.24 | <b>1.93</b> | <b>1.33-2.82</b> | 0.07 | 1.29        | 0.93-1.80        |
| <b>Cumulative exposure to forceful hand movements</b>              |             |                  |      |             |                  |      |             |                  |      |             |                  |
| < 1 year                                                           | 1.00        |                  |      | 1.00        |                  |      | 1.00        |                  |      | 1.00        |                  |
| 1-10 years                                                         | 1.34        | 0.87-2.08        |      | 1.72        | 0.90-3.26        |      | 1.15        | 0.61-2.15        |      | 1.30        | 0.74-2.29        |
| > 10 years                                                         | <b>2.98</b> | <b>2.25-3.94</b> | 0.26 | <b>3.51</b> | <b>2.25-5.47</b> | 0.42 | <b>2.70</b> | <b>1.83-3.96</b> | 0.14 | <b>1.79</b> | <b>1.22-2.63</b> |
| <b>Cumulative exposure to forward bent posture</b>                 |             |                  |      |             |                  |      |             |                  |      |             |                  |
| < 1 year                                                           | 1.00        |                  |      | 1.00        |                  |      | 1.00        |                  |      | 1.00        |                  |
| 1-10 years                                                         | 1.07        | 0.69-1.66        |      | 1.31        | 0.72-2.37        |      | 0.89        | 0.46-1.73        |      | 0.93        | 0.55-1.60        |
| > 10 years                                                         | <b>1.93</b> | <b>1.48-2.52</b> | 0.14 | <b>2.12</b> | <b>1.40-3.20</b> | 0.19 | <b>1.81</b> | <b>1.27-2.57</b> | 0.11 | 0.92        | 0.66-1.29        |

<sup>1</sup> HRs are adjusted for age and gender. <sup>2</sup> HRs are adjusted for age. <sup>3</sup> HRs are adjusted for all variables in the table, except education and leisure time physical activity. <sup>4</sup> HRs are adjusted for gender.
