# Supplementary material for: Occupational and non-occupational risk factors of sickness absence due to a shoulder lesion
Source: PubMed Central journal article supplement — Occup Environ Med. 2020 Mar 18;77(6):393–401. doi: 10.1136/oemed-2019-106335 (PMC7279187; doi:10.1136/oemed-2019-106335), 2020-03-18
Supplement: oemed-2019-106335supp004.pdf [file oemed-2019-106335supp004.pdf]

**Supplementary table S3.** Associations between potential risk factors and sickness absence due to a shoulder lesion and population attributable fractions (PAF). Adjusted hazard ratios (HR) with 95% confidence intervals (CI).

|                                                                 | All (n=3672)    |                  |      | Men (n=1783)    |                   |      | Women (n=1889)  |                  |      |
|-----------------------------------------------------------------|-----------------|------------------|------|-----------------|-------------------|------|-----------------|------------------|------|
|                                                                 | HR <sup>1</sup> | 95% CI           | PAF  | HR <sup>2</sup> | 95% CI            | PAF  | HR <sup>2</sup> | 95% CI           | PAF  |
| <b>Age (at baseline)</b>                                        |                 |                  |      |                 |                   |      |                 |                  |      |
| 30-39 years                                                     | 1.00            |                  |      | 1.00            |                   |      | 1.00            |                  |      |
| 40-49 years                                                     | <b>2.06</b>     | <b>1.51-2.82</b> |      | <b>1.97</b>     | <b>1.22-3.16</b>  |      | <b>2.24</b>     | <b>1.46-3.42</b> |      |
| 50-62 years                                                     | <b>3.84</b>     | <b>2.46-5.97</b> |      | <b>5.70</b>     | <b>3.01-10.79</b> |      | <b>2.84</b>     | <b>1.49-5.42</b> |      |
| <b>BMI (kg/m<sup>2</sup>)</b>                                   |                 |                  |      |                 |                   |      |                 |                  |      |
| Normal (< 25)                                                   | 1.00            |                  |      | 1.00            |                   |      | 1.00            |                  |      |
| Overweight (25.0-29.9)                                          | 1.29            | 0.95-1.76        |      | 1.43            | 0.87-2.34         |      | 1.31            | 0.88-1.97        |      |
| Obese ( $\geq$ 30)                                              | 1.40            | 0.97-2.00        |      | <b>2.40</b>     | <b>1.40-4.12</b>  | 0.32 | 0.85            | 0.50-1.42        |      |
| <b>Chronic disease</b>                                          |                 |                  |      |                 |                   |      |                 |                  |      |
| No                                                              | 1.00            |                  |      | 1.00            |                   |      | 1.00            |                  |      |
| Yes                                                             | 1.25            | 0.95-1.65        |      | 1.04            | 0.68-1.60         |      | 1.44            | 0.99-2.10        |      |
| <b>Daily smoking</b>                                            |                 |                  | 0.15 |                 |                   | 0.14 |                 |                  | 0.14 |
| No                                                              | 1.00            |                  |      | 1.00            |                   |      | 1.00            |                  |      |
| Yes                                                             | <b>1.66</b>     | <b>1.25-2.19</b> |      | <b>1.53</b>     | <b>1.01-2.32</b>  |      | <b>1.74</b>     | <b>1.19-2.55</b> |      |
| <b>Cumulative exposure to physically heavy work</b>             |                 |                  | 0.19 |                 |                   |      |                 |                  | 0.23 |
| < 10 years                                                      | 1.00            |                  |      | 1.00            |                   |      | 1.00            |                  |      |
| > 10 years                                                      | <b>1.78</b>     | <b>1.27-2.50</b> |      | 1.31            | 0.77-2.23         |      | <b>2.19</b>     | <b>1.41-3.39</b> |      |
| <b>Number of expositors with time of exposure &gt; 10 years</b> |                 |                  | 0.26 |                 |                   | 0.30 |                 |                  | 0.27 |
| none                                                            | 1.00            |                  |      | 1.00            |                   |      | 1.00            |                  |      |
| one                                                             | 1.27            | 0.83-1.94        |      | 0.66            | 0.27-1.61         |      | <b>1.69</b>     | <b>1.01-2.82</b> |      |
| two -four                                                       | <b>2.07</b>     | <b>1.42-3.03</b> |      | <b>2.24</b>     | <b>1.25-3.98</b>  |      | <b>2.08</b>     | <b>1.25-3.47</b> |      |
| <b>Job demands</b>                                              |                 |                  |      |                 |                   |      |                 |                  |      |
| Low                                                             | 1.00            |                  |      | 1.00            |                   | 0.23 | 1.00            |                  |      |
| High                                                            | 1.15            | 0.87-1.52        |      | <b>1.55</b>     | <b>1.01-2.38</b>  |      | 0.96            | 0.66-1.39        |      |
| <b>Psychological distress (GHQ-12)</b>                          |                 |                  |      |                 |                   |      |                 |                  |      |
| No or mild                                                      | 1.00            |                  |      | 1.00            |                   |      | 1.00            |                  |      |

|                                  |                        |             |                  |      |           |             |                  |
|----------------------------------|------------------------|-------------|------------------|------|-----------|-------------|------------------|
|                                  | At least moderate      | 0.93        | 0.64-1.35        | 0.64 | 0.34-1.21 | 1.14        | 0.72-1.81        |
| <b>Insomnia-related symptoms</b> |                        |             | <b>0.15</b>      |      |           |             | <b>0.17</b>      |
|                                  | No or rare             | 1.00        |                  | 1.00 |           | 1.00        |                  |
|                                  | Occasional or frequent | <b>1.58</b> | <b>1.16-2.14</b> | 1.54 | 0.97-2.44 | <b>1.65</b> | <b>1.09-2.49</b> |
| <b>Overall PAF</b>               |                        |             | <b>0.64</b>      |      |           | <b>0.68</b> | <b>0.60</b>      |

HRs and their 95% CI are adjusted <sup>1</sup> for gender and all variables in the table, <sup>2</sup> for all variables in the table
