# Supplementary material for: Occupational and non-occupational risk factors of sickness absence due to a shoulder lesion
Source: PubMed Central journal article supplement — Occup Environ Med. 2020 Mar 18;77(6):393–401. doi: 10.1136/oemed-2019-106335 (PMC7279187; doi:10.1136/oemed-2019-106335), 2020-03-18
Supplement: oemed-2019-106335supp005.pdf [file oemed-2019-106335supp005.pdf]

**Supplementary table S4.** Associations between potential risk factors and sickness absence due to a shoulder lesion. Adjusted hazard ratios (HR) with 95% confidence intervals (CI) and population attributable fractions (PAF).

|                                                                 | All (n=3637)           |             |                  | Men (n=1776)    |             |                   | Women (n=1861)  |             |                  |
|-----------------------------------------------------------------|------------------------|-------------|------------------|-----------------|-------------|-------------------|-----------------|-------------|------------------|
|                                                                 | HR <sup>1</sup>        | 95% CI      | PAF              | HR <sup>2</sup> | 95% CI      | PAF               | HR <sup>2</sup> | 95% CI      | PAF              |
| <b>Age (at baseline)</b>                                        |                        |             |                  |                 |             |                   |                 |             |                  |
|                                                                 | 30-39 years            | 1.00        |                  | 1.00            |             |                   | 1.00            |             |                  |
|                                                                 | 40-49 years            | <b>2.12</b> | <b>1.55-2.90</b> |                 | <b>1.99</b> | <b>1.24-3.20</b>  |                 | <b>2.35</b> | <b>1.54-3.58</b> |
|                                                                 | 50-62 years            | <b>4.08</b> | <b>2.63-5.35</b> |                 | <b>5.56</b> | <b>2.98-10.38</b> |                 | <b>3.08</b> | <b>1.62-5.85</b> |
| <b>BMI (kg/m<sup>2</sup>)</b>                                   |                        |             |                  |                 |             |                   |                 |             |                  |
|                                                                 | Normal (< 25)          | 1.00        |                  | 1.00            |             |                   | 1.00            |             |                  |
|                                                                 | Overweight (25.0-29.9) | 1.26        | 0.93-1.72        |                 | 1.42        | 0.87-2.33         |                 | 1.26        | 0.84-1.88        |
|                                                                 | Obese ( $\geq$ 30)     | 1.42        | 0.99-2.04        |                 | <b>2.48</b> | <b>1.45-4.25</b>  | 0.32            | 0.85        | 0.50-1.43        |
| <b>Chronic disease</b>                                          |                        |             |                  |                 |             |                   |                 |             |                  |
|                                                                 | No                     | 1.00        |                  | 1.00            |             |                   | 1.00            |             | 0.17             |
|                                                                 | Yes                    | 1.30        | 0.99-1.72        |                 | 1.06        | 0.69-1.61         |                 | <b>1.51</b> | <b>1.04-2.19</b> |
| <b>Daily smoking</b>                                            |                        |             |                  |                 |             |                   |                 |             |                  |
|                                                                 | No                     | 1.00        |                  | 1.00            |             |                   | 1.00            |             |                  |
|                                                                 | Yes                    | <b>1.64</b> | <b>1.26-2.17</b> | 0.15            | <b>1.54</b> | <b>1.01-2.33</b>  | 0.15            | <b>1.69</b> | <b>1.15-2.47</b> |
| <b>Cumulative exposure to physically heavy work</b>             |                        |             |                  |                 |             |                   |                 |             |                  |
|                                                                 | < 10 years             | 1.00        |                  | 1.00            |             |                   | 1.00            |             |                  |
|                                                                 | > 10 years             | <b>1.75</b> | <b>1.25-2.46</b> | 0.19            | 1.28        | 0.75-2.19         |                 | <b>2.18</b> | <b>1.41-3.36</b> |
| <b>Number of expositors with time of exposure &gt; 10 years</b> |                        |             |                  |                 |             |                   |                 |             |                  |
|                                                                 | none                   | 1.00        |                  | 1.00            |             |                   | 1.00            |             | 0.27             |
|                                                                 | one                    | 1.27        | 0.83-1.95        |                 | 0.67        | 0.27-1.65         |                 | <b>1.67</b> | <b>1.00-2.78</b> |
|                                                                 | two -four              | <b>2.09</b> | <b>1.43-3.05</b> | 0.27            | <b>2.30</b> | <b>1.29-4.11</b>  | 0.31            | <b>2.09</b> | <b>1.26-3.47</b> |
| <b>Job demands</b>                                              |                        |             |                  |                 |             |                   |                 |             |                  |
|                                                                 | Low                    | 1.00        |                  | 1.00            |             |                   | 0.23            | 1.00        |                  |
|                                                                 | High                   | 1.18        | 0.90-1.56        |                 | <b>1.54</b> | <b>1.00-2.36</b>  |                 | 0.99        | 0.86-1.91        |
| <b>Overall PAF</b>                                              |                        |             |                  |                 |             |                   |                 |             |                  |
|                                                                 |                        |             | <b>0.49</b>      |                 |             | <b>0.69</b>       |                 |             | <b>0.59</b>      |
